# Supplementary material
Source: PubMed Central journal article supplement (PMC4935650)
Supplement: NIHMS736169-supplement-1.pdf [file NIHMS736169-supplement-1.pdf]

## 1 MATERIALS AND METHODS

2  
3 **Histology, immunohistochemistry and microscopy.** We processed brains with  
4 immunohistochemistry to detect cells expressing Avp, and GFP and, in separate tissue, the  
5 immediate early gene product Arc. For Arc analysis, Avp-Cre mice received optical stimulation,  
6 as described above, then 90 min later were deeply anesthetized and transcardially perfused with  
7 0.9% saline followed by 4% paraformaldehyde solution. Brains were stored in 20% sucrose in  
8 phosphate buffer (PB) at 4°C, and then cut into 15 µm coronal sections using a cryostat and  
9 mounted on slides. For Avp, and GFP analysis, mice were anesthetized and perfusion, and brains  
10 were sectioned, as described above.

11  
12 A 1:6 series through the PVN and hippocampus of each brain was processed for single-labeling  
13 for Arc or double-labeling for GFP-ir/Avp-ir, respectively. For Arc staining, mounted sections  
14 were rinsed in 0.1 M PB for 5 min (3x) and again after each of the following steps: incubation in  
15 1% NaHB<sub>4</sub> in PB for 10 min; incubation for 10 min in 1X Powerblock (Universal Blocking  
16 Reagent, Biogenex) to block endogenous peroxidase activity and 24 h in 1:100 anti-Arc (Rabbit,  
17 sc-15325, Santa Cruz); and blocked for 10 min with Peroxidase Blocking Agent (Dako).  
18 Sections were then rinsed in 0.1 M Tris (ph 8.0) for 5 min (3x) and again after each of the  
19 following steps: 30 min incubation in a humidified chamber with Super Picture HRP Polymer  
20 Conjugate Rabbit antibody (Invitrogen); 20 min incubation in a dark humidified chamber with  
21 1:50 TSA Plus FITC tyramide (Perkin Elmer); and a 5 min incubation in 1:10K DAPI. For  
22 GFP/Avp staining, mounted sections were processed as described above, with substitution of the  
23 primary antibody for 1:200 anti-GFP (Rabbit, A6455, Molecular Probes) and repeated the  
24 protocol for Avp staining using a Avp antibody (1:100, Mouse, gifted from Dr. Harold Gainer,  
25 NIMH) and TSA Plus Cyanine 3 (Perkin Elmer).

26  
27 Images were acquired by using a fluorescent microscope (Nikon 50i) with a 4',6-diamidino-2-  
28 phenylindole (DAPI) filter for DAPI-stained sections, a fluorescein isothiocyanate (FITC) filter  
29 for Arc- and GFP-stained sections, and a tetramethylrhodamine isothiocyanate (TRITC) filter for  
30 Avp-stained sections and mCherry fluorescence. iVision (BioVision Technologies) was used to  
31 process images, with between 100-500 msec exposure times. Staining measurements were  
32 conducted using ImageJ (U.S. National Institutes of Health). Densities of single-labeled (Avp,  
33 GFP, and DAPI) and double-labeled cells (GFP cells expressing Avp) in the PVN were counted  
34 in every sixth section (which occurred at 90 µm intervals), resulting in three sections counted per  
35 mouse. The average of the counted single-labeled Arc cells was then divided by the area of the  
36 PVN (averaging 0.225 mm<sup>2</sup> per hemisphere) to yield the number of single-labeled Arc cells per  
37 0.1 mm<sup>2</sup>. Percentages of labeled neurons expressing Avp and GFP were calculated by dividing  
38 the number of these cells the total number of DAPI-labeled cells in the PVN. GFP-labeled cells  
39 expressing Avp were also divided by total GFP-labeled cells in the PVN.

### 41 **ViewRNA *in situ* hybridization (ISH) tissue assay**

42 The ViewRNA ISH Tissue Assay for RNA *in situ* hybridization histochemistry was used to  
43 visualize transcripts of the Avpr1a, Avpr1b, and Oxt genes according to the manufacturer's  
44 instructions (Panomics-Affymetrix, Santa Clara, CA). The proprietary probes were designed and  
45 synthesized by Affymetrix. Briefly, 16µ sections were cut from fresh-frozen brains and mounted  
46 onto SuperFrost Plus slides (Fisher Scientific, Hampton, NH). The slides were incubated at 4°C

47 in 4% formaldehyde in phosphate-buffered saline (PBS) overnight. The following day, slides  
48 were dehydrated through graded ethanol washes (50%, 70%, 100%) at room temperature for 10  
49 min each, and then baked at 60°C for 30 min. A working protease dilution was then made at  
50 1:100 in 40°C PBS, and slides were incubated at 40°C for 10 min. After a brief wash in PBS, the  
51 sections fixed again in 4% formaldehyde for 5 min at room temperature. The working probe set  
52 solutions were prepared at a 1:40 dilution in 40°C probe set diluent, and hybridization took place  
53 for 2 hr at 40°C. Following hybridization, slides were washed three times for 2 min each in  
54 wash buffer with constant and vigorous agitation. Next, signal amplification was performed with  
55 the Preamplifier Mix QT (25 min, 40°C) followed by the Amplifier Mix QT(15 min, 40°C) with  
56 wash steps in between. Next, the slides were placed in Label Probe 1-AP kit solution at a 1:1000  
57 dilution in 40°C Label Probe Diluent QF for 15 min at 40°C. A fast red substrate was then  
58 applied and slides were incubated for 30 min in the dark at 40°C. Immediately following  
59 development, the tissues were briefly washed in PBS and counterstained with DAPI.  
60  
61

62 FIGURES  
63

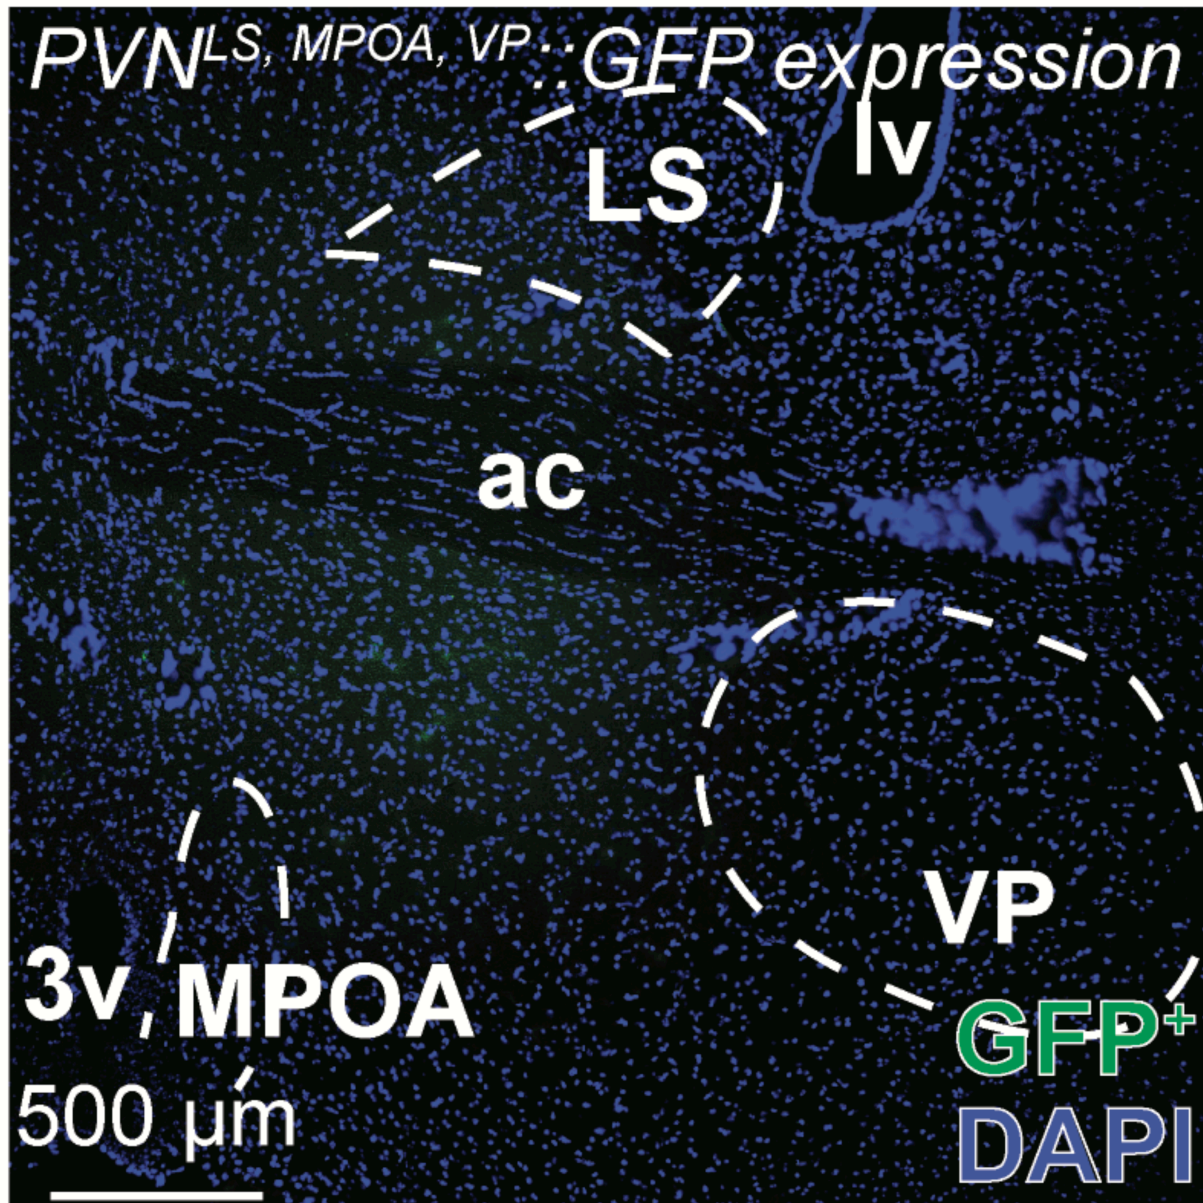

64  
65 **Supplemental Figure 1. The  $Avp^{PVN \rightarrow CA2}$  pathway does not bifurcate to other regions.** This  
66 is a representative image of coronal sections showing the absence of green fluorescent protein  
67 ( $GFP^+$ , green) expression in the lateral septum (LS), ventral pallidum (VP), and medial preoptic  
68 area (MPOA), regions hypothalamic paraventricular nucleus (PVN) Avp neurons are known to  
69 innervate, following a Cre-inducible HSV-GFP injection into the CA2 of AVP promoter-driven  
70 Cre ( $Avp$ -Cre) mice. The lateral ventricle (lv), anterior commissure (ac), and third ventricle (3v)  
71 are labeled for anatomical reference points. Cell nuclei are stained with 4',6-diamidino-2-  
72 phenylindole (DAPI, blue). The scale bar is 500  $\mu m$ .

73

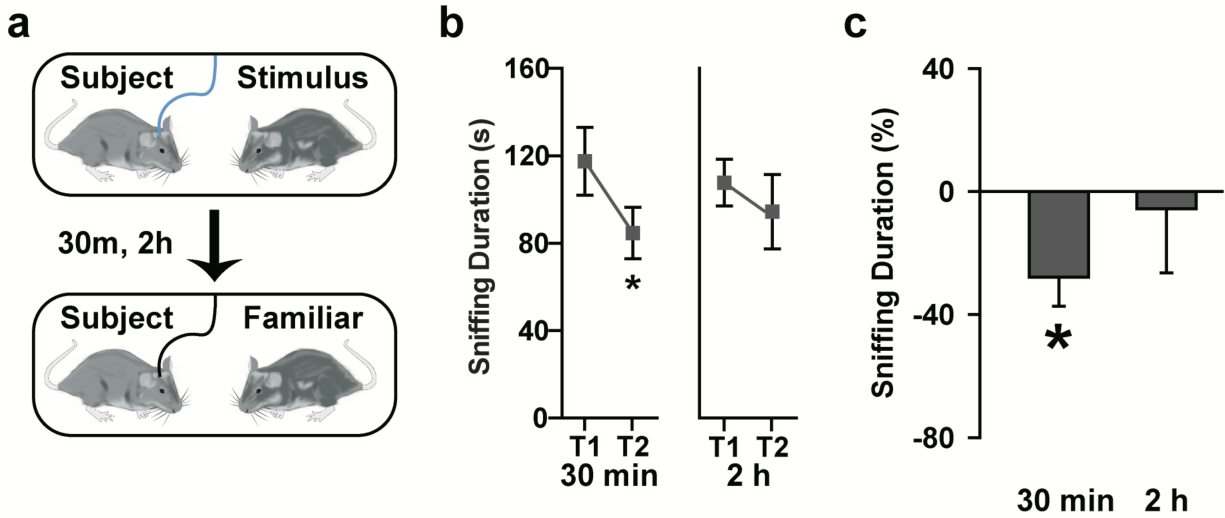

74  
 75 **Supplemental Figure 2. Retention of social memory in WT mice is limited.** **a**, Wild-type  
 76 (WT) mice were exposed to the same female during two 5-minute trials (T1 and T2) with a  
 77 retention interval of 30 min or 2 hr (h). **b**, WT mice decrease investigation of a mouse  
 78 encountered in trial 1 if trial 2 occurs 30 min ( $n = 12$ ,  $t(11) = 2.24$ ,  $P < 0.05$ ) later but not 2 hr ( $n$   
 79  $= 13$ ,  $t(12) = 1.44$ ,  $P = 0.18$ ). **c**, The percent change score for investigation was significantly in  
 80 the 30-min retention paradigm ( $n = 16$ ,  $t(15) = -2.93$ ,  $P < 0.01$ ) but not the 2-hr retention  
 81 paradigm ( $n = 17$ ,  $t(16) = -0.27$ ,  $P = 0.79$ ).

82  
 83

**a**

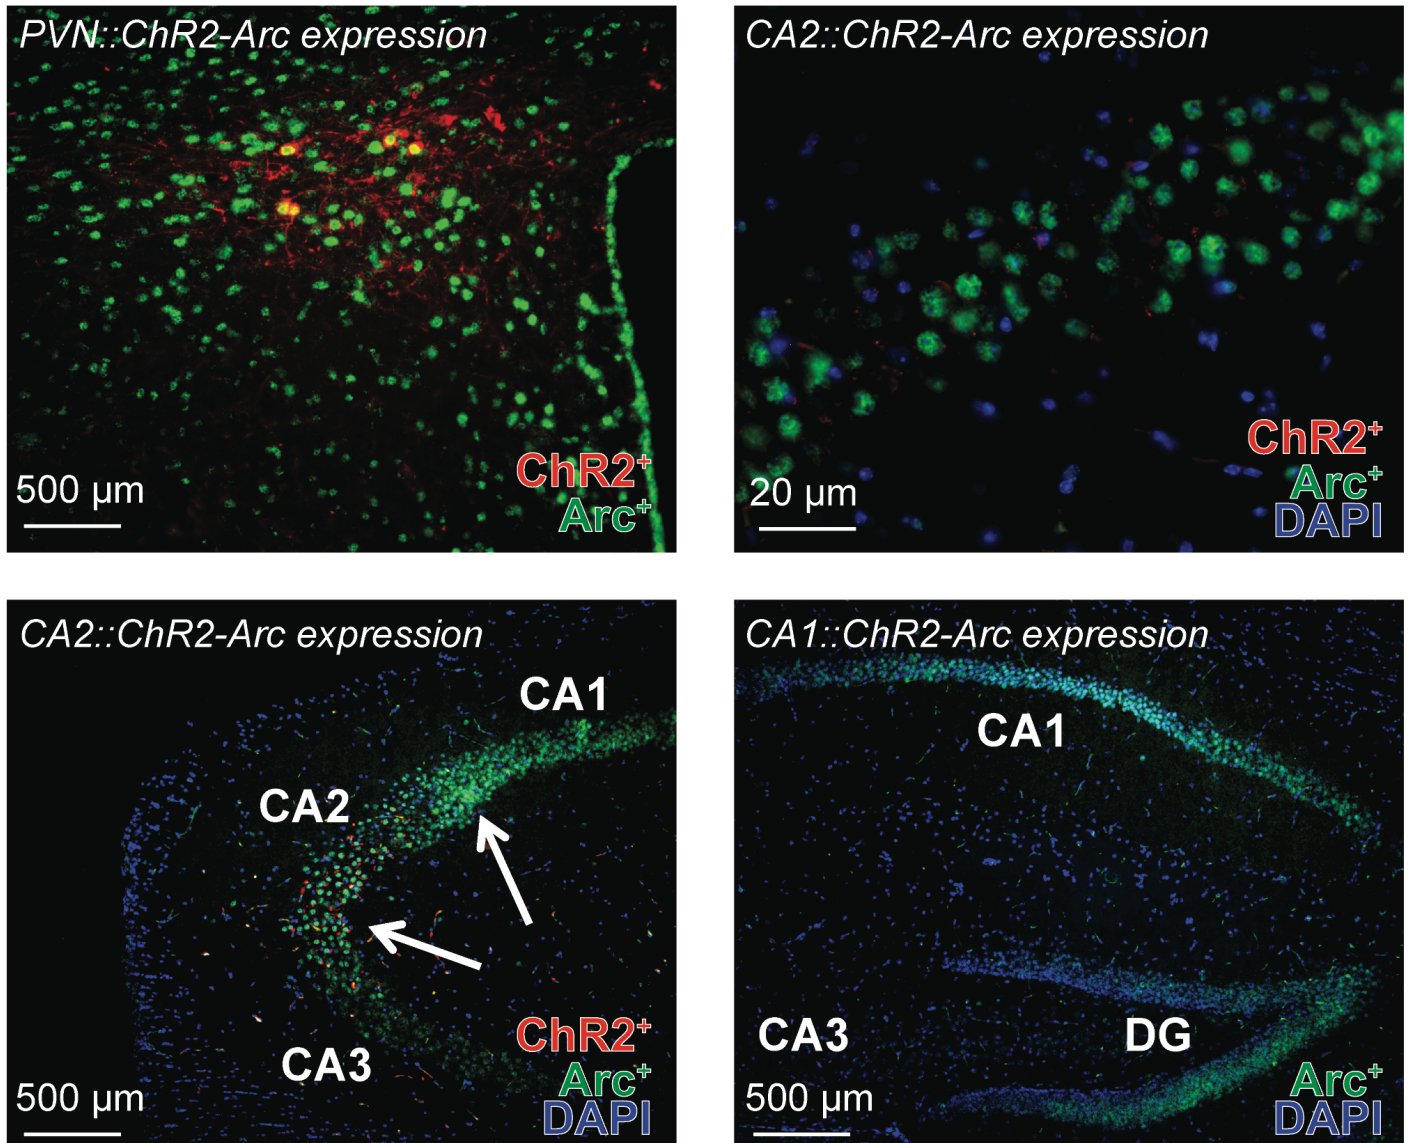

**b**

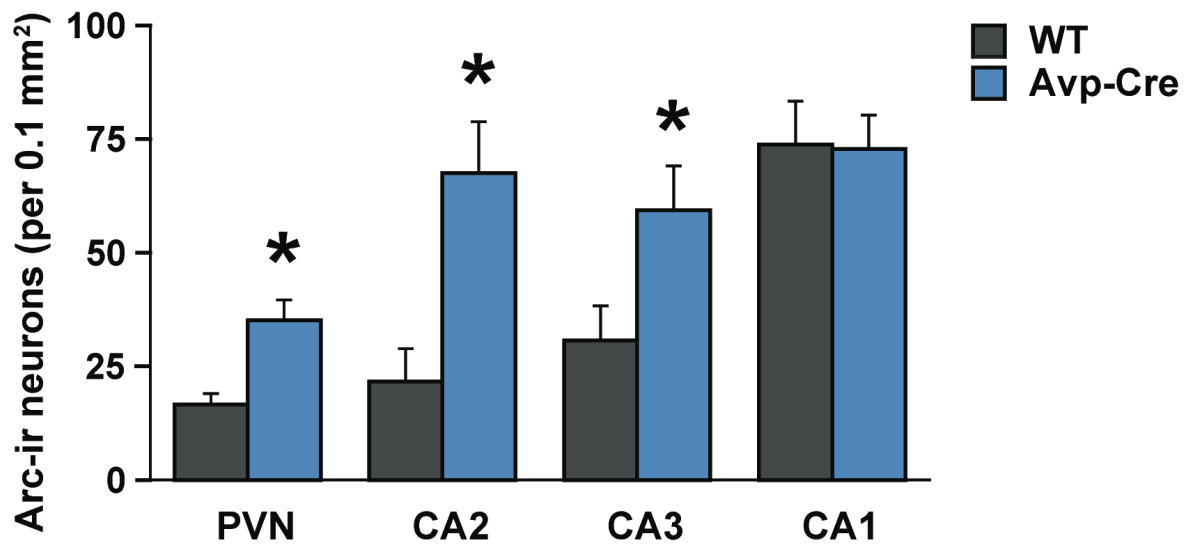

84 **Supplemental Figure 3. Optical stimulation increases Arc-immunoreactivity (-ir) density in**  
 85 **the PVN and CA2. a,** Images of coronal sections showing expression of ChR2 fused to mCherry  
 86 (ChR2<sup>+</sup>, red) and Arc (Arc<sup>+</sup>, green) staining in neurons in the PVN of Avp-Cre mice (top left).  
 87 Arc<sup>+</sup> staining is observed throughout the hippocampus. However, ChR2<sup>+</sup> fibers, originating from  
 88 the PVN Avp neurons, are observed in the CA2 (top right) and immediately adjacent CA3  
 89 (bottom left) hippocampal areas, but not the dentate gyrus (DG) or CA1 (bottom right). Arrows  
 90 are used to identify anatomical boundaries for the CA areas. Cell nuclei are stained with DAPI  
 91 (blue). Scale bars are labeled for each image. **b,** Optical stimulation increased Arc-ir density in  
 92 the PVN ( $t(13) = 3.77, P < 0.005$ ), CA2 ( $t(13) = 3.59, P < 0.005$ ), and CA3 ( $t(13) = 2.34, P <$   
 93  $0.05$ ) of Avp-Cre mice (blue,  $n = 7$ ) compared to wild-type (WT) mice (grey,  $n = 8$ ). Arc-ir  
 94 density in the CA1 was not affected ( $t(13) = 0.08, P = 0.93$ ).  
 95

a

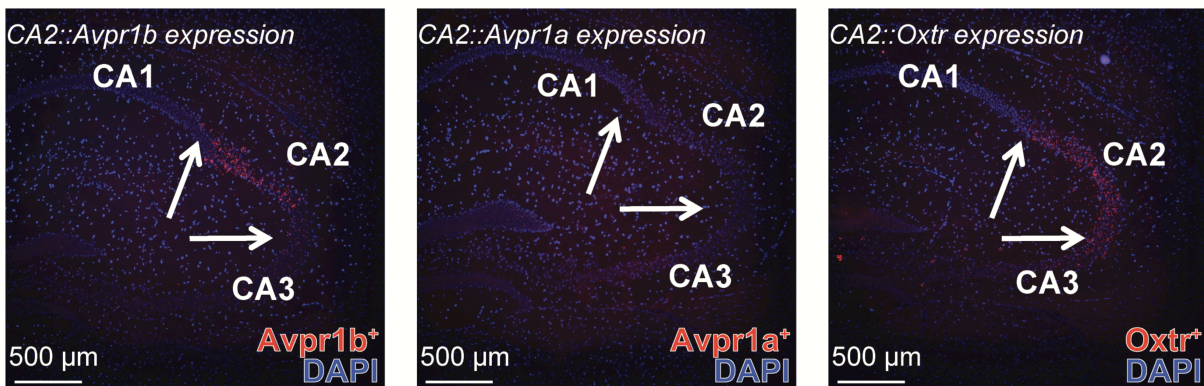

b

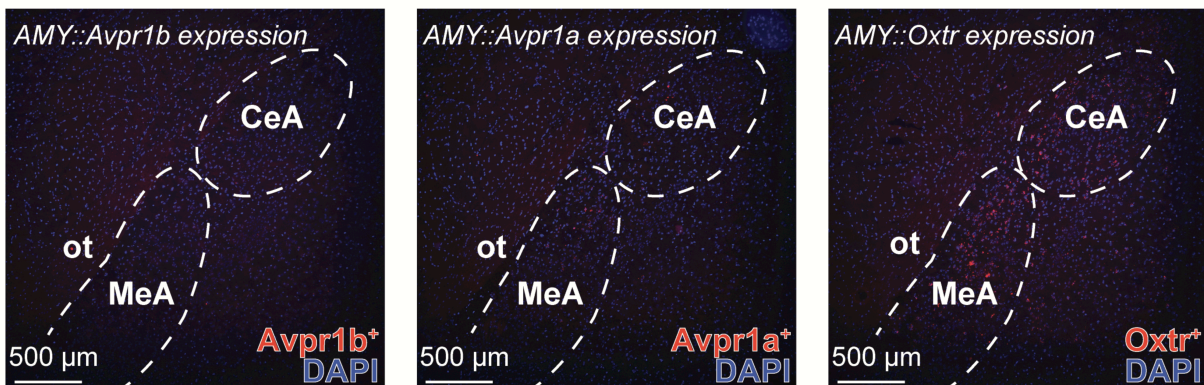

96

97 **Supplemental Figure 4. Expression of Avp and Oxt receptors in the hippocampus and**  
 98 **amygdala. a,** These are images of coronal sections showing expression of vasopressin 1b  
 99 receptor (Avpr1b<sup>+</sup>, left), vasopressin 1a receptor (Avpr1a<sup>+</sup>, middle), and oxytocin receptor  
 100 (Oxtr<sup>+</sup>, right) mRNA in different subregions of the hippocampus (CA1, CA2, and CA3). Arrows  
 101 are used to identify anatomical boundaries for the CA areas. Avpr1b expression in the  
 102 hippocampus is restricted, nearly exclusively, to the CA2 with some expression in the CA3. By  
 103 comparison, Avpr1a is all but absent in the CA areas, while Oxtr expression is widely seen in  
 104 both CA2 and CA3. **b,** These are images of coronal sections showing expression of Avpr1b<sup>+</sup>  
 105 (left), Avpr1a<sup>+</sup> (middle), and Oxtr<sup>+</sup> (right) mRNA in different subregions of the amygdala or  
 106 AMY (medial amygdala, MeA; central amygdala, CeA). In the MeA and CeA (outlined by

107 dashed lines), Oxt is expressed most robustly, Avpr1a is expressed more sparingly, and Avpr1b  
108 is absent. The optic tract is labeled for as an anatomical reference point. Cell nuclei are stained  
109 with DAPI (blue). The scale bars are 500  $\mu\text{m}$ .  
110
